# Supplementary material for: One-step hydrothermal synthesis and optical properties of PEG-passivated nitrogen-doped carbon dots
Source: Royal Society of Chemistry journal article supplement (doi:10.1039/c4ra08869g), 2014-12-22
Supplement: c4ra08869g1.pdf [file c4ra08869g1.pdf]

## Electronic Supplementary Information

# One-step Hydrothermal Synthesis and Optical Properties of PEG-passivated Nitrogen-doped Carbon Dots

Ben-Xing Zhang,<sup>a</sup> Gang-Yi Zhang,<sup>a</sup> Hui Gao,<sup>a\*</sup> Shao-Hui Wu,<sup>a</sup> Jian-Hua Chen<sup>a</sup> and Xiao-Long Li<sup>b</sup>

<sup>a</sup> School of Physical Science and Technology, Key Laboratory for Magnetism and Magnetic Materials of Ministry of Education, Lanzhou University, Lanzhou 730000, P. R. China

E-mail: hope@lzu.edu.cn; Fax: +81 931 8913554; Tel: +81 931 8912772

<sup>b</sup> Shanghai Synchrotron Radiation Facility, Shanghai Institute of Applied Physics, Chinese Academy of Sciences, Shanghai 201204, P. R. China

### Supporting Figures:

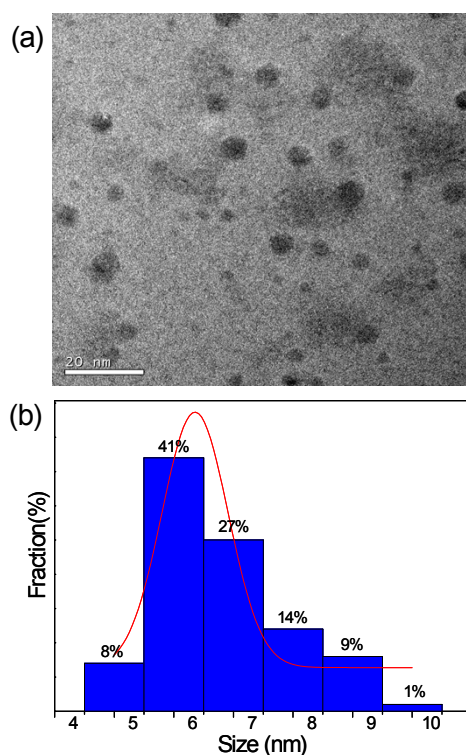

Fig. S1 (a) TEM image of NCDs. (b) Corresponding size distribution analysis of NCDs.

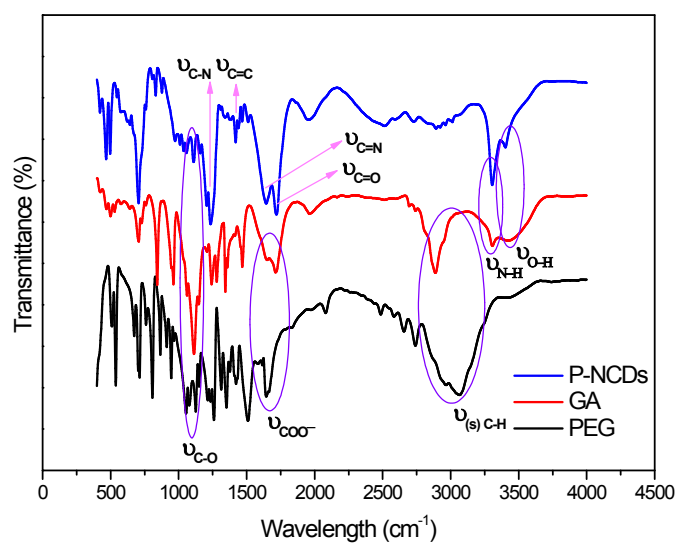

Fig. S2 FT-IR data of P-NCDs and raw materials.

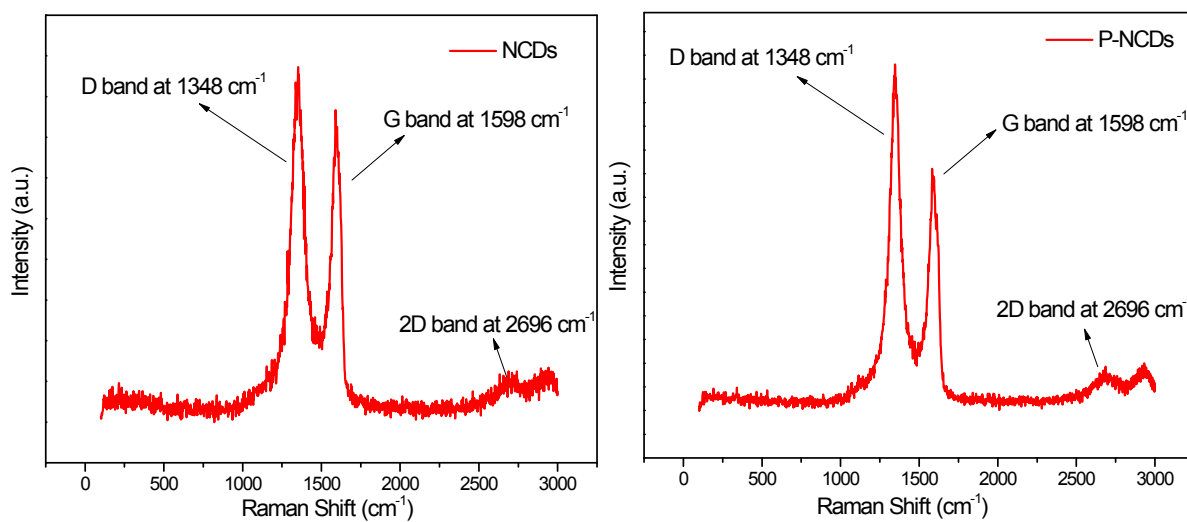

Fig. S3 Raman spectra of NCDs and P-NCDs.

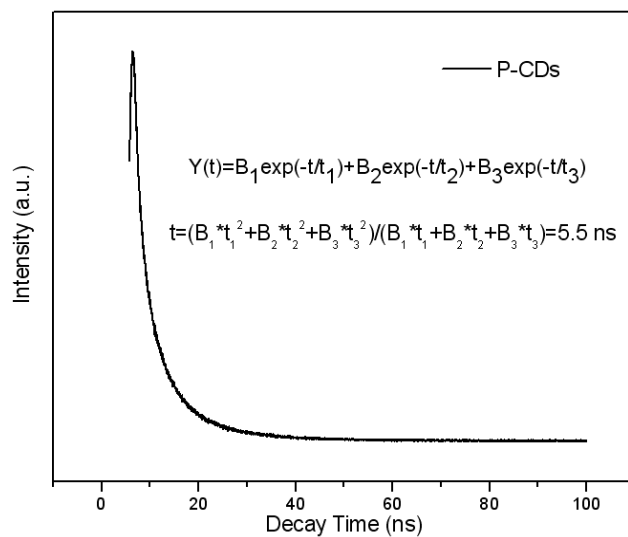

Fig. S4 Decay curve and lifetime of P-NCDs excited at the wavelength of 350 nm.

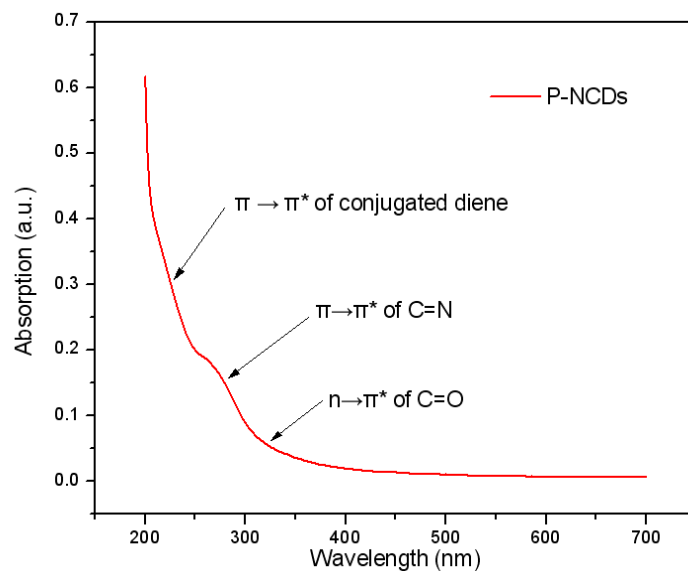

Fig. S5 The absorption curve of P-NCDs.

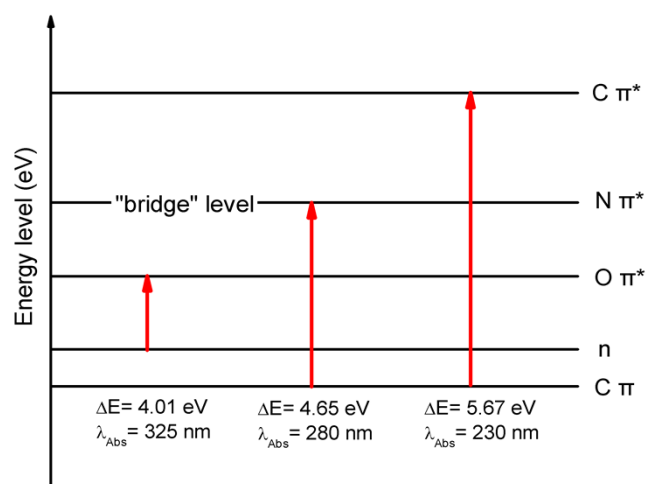

Fig. S6 A schematic illustrating the energy levels and absorption peaks of the P-NCDs.
